1 Wheelchair user's voice: a pilot study in Indonesia

2  
3 Stephanie Gabela Vasquez<sup>1¶</sup>, Megan E. D'Innocenzo<sup>1¶</sup>, Jon Pearlman<sup>1&</sup>, Christy Zigler<sup>2&</sup>,  
4 Yasmin Garcia Mendez<sup>3&</sup>, Perth Rozen<sup>3&</sup>, Eviana Hapsari Dewi<sup>4</sup>, Ignatius Praptoraharjo<sup>4</sup>

5 <sup>1</sup> Department of Rehabilitation Science and Technology, University of Pittsburgh, Pittsburgh,  
6 PA, United States of America

7 <sup>2</sup> Department of Population Health Science, Duke University, Durham, NC, United States of  
8 America

9 <sup>3</sup> United Cerebral Palsy (UCP) Wheels for Humanity, Chatsworth, California, United States of  
10 American

11 <sup>4</sup> Department of Health Policy and Management, Gadjah Mada University, Yogyakarta, Indonesia

12

13 \* Corresponding author

14 E-mail: [jpearlman@pitt.edu](mailto:jpearlman@pitt.edu)

15

16 ¶ These authors contributed equally to this work.

17 & These authors also contributed equally to this work

18

19

20

21

22

23

24

25

## 26 **Abstract**

27 There is a significant unmet need for appropriate wheelchairs worldwide. As a whole, studies  
28 suggest that appropriate wheelchairs have a positive impact on the quality of life and health of  
29 wheelchair users, which is consistent with the goals and outcomes in more resourced settings,  
30 and that when services are provided along with the wheelchair, the positive impact is increased.  
31 The gaps in previous research, along with the global focus on evidence-based decision making,  
32 were strong motivators for carrying out a study that contrasted the outcomes associated with  
33 different types of wheelchair service provision strategies. This study used a sample of  
34 participants randomly selected from a waitlist ( $N=142$ ) or people who used wheelchairs as their  
35 primary means of mobility. Two different groups were included, the 8-Steps group and the  
36 Standard of Care (SOC) group. The 8-Steps group ( $N=118$ ) received wheelchairs from service  
37 providers trained using the World Health Organization (WHO) 8-Step process and the SOC  
38 group ( $N=24$ ) received hospital-style wheelchairs and standard care. Interviews were conducted  
39 at baseline and a follow up 3-6 months after distribution, to collect data using the following  
40 tools: International Society of Wheelchair Professionals (ISWP) Minimum Uniform Data Set  
41 (MUD), Wheelchair Skills Test Questionnaire (WST-Q), and Life Satisfaction Questionnaire  
42 (LiSAT-11), and Breakdown and Adverse Consequences Questionnaire (BAC-Q). Across-group  
43 statistical comparisons were not attempted. The majority of participants from the 8-Steps group  
44 used their wheelchair every day for more than 8 hours a day. In contrast, the SOC group used  
45 their wheelchairs less than 6 hours a day. Both groups traveled less than 500 meters per day.  
46 Participants' WST-Q scores were low,  $<65\%$ , at both baseline and endline, with a significant  
47 decrease at endline. No significant differences were found when comparing device satisfaction  
48 across wheelchairs types. The majority ( $n=87$ ;  $72.7\%$ ) of 8-Steps group participants reported

49 performing wheelchair maintenance. Less than half (n=9; 37.5%) of the SOC group reported  
50 performing maintenance activities. For both groups, the most reported maintenance activity was  
51 wiping or washing the wheelchair, and most wheelchair repairs were performed by the study  
52 participant or a family member. The results of this study demonstrate the importance of the  
53 WHO 8-steps training package for wheelchair provision. Further studies, training services, and  
54 wheelchair skills are needed in low and middle-income countries for both wheelchair users and  
55 service providers.

56

## 57 **Introduction**

58         There is a significant unmet need for appropriate wheelchairs around the world. Using  
59 population-based estimates published by WHO, approximately 77 million people worldwide  
60 currently require the use of a wheelchair for mobility [1]. Data collected in several less-  
61 resourced settings (LRS) on access to assistive technologies suggests that only between 17% and  
62 37% have access to appropriate assistive technologies, such as wheelchairs. Based on these data,  
63 an estimated 33-65 million people who need wheelchairs do not have access to them. This large  
64 unmet need has motivated governments, private companies, and not-for-profit organizations to  
65 provide wheelchairs through a range of largely uncoordinated service provision and supply chain  
66 approaches for the past several decades [2,3]. Concerns that some of these approaches lacked  
67 the desired impact (e.g. [4,5]) motivated a multi-year effort to establish standards related to  
68 service and product quality. A consensus conference held in 2006 led by the WHO [6] resulted  
69 in the development and publication of consensus guidelines [7] on manual wheelchair provision,  
70 and a set of consensus-based training packages to educate wheelchair service providers [8–

71 10]. Efforts to disseminate these tools are substantial – they are widely promoted by different  
72 organizations (e.g. [WFOT](#), [WCPT](#), [ISWP](#), [ISPO](#)), they are translated into several languages, and  
73 they are being adopted as the basis for global training [11,12], and competency evaluations [13].

74 In spite of these dissemination efforts, there has been relatively little change in the  
75 wheelchair sector, and governments, private companies, and not-for-profits continue to distribute  
76 wheelchairs that would not be considered ‘appropriate’ [6] through the service delivery approach  
77 that does not include all 8 steps recommended by WHO [7]. There are two key reasons that  
78 organizations do not universally adopt these consensus approaches. First, policies that dictate the  
79 type of wheelchair service provision are weak or non-existent in many countries where the need  
80 is greatest, and therefore organizations are not obligated to adhere to specific service or product  
81 quality standards. Second, there is a paucity of evidence that providing wheelchairs through the  
82 approach outlined by WHO, which is costlier and requires a long-term commitment, addresses  
83 the needs for wheelchairs users more efficiently or effectively.

84 These two reasons are closely linked and related to a lack of objective evidence about the  
85 marginal benefits of providing appropriate wheelchairs through a costlier 8-step approach  
86 (described by WHO) versus simply giving a standard hospital-style wheelchair to someone who  
87 requests it, which continues to be the standard of care in most countries. Subjective evidence  
88 indicating that hospital-style wheelchairs fail quickly in the community were published as early  
89 as 1990 [4,14], but investigated only a small number of wheelchairs and were geographically  
90 focused on India. Interest about the impact of wheelchair service increased as the sector began to  
91 coordinate in 2006 when the WHO became involved [15], and researchers began to collect and  
92 publish outcome data. For instance, a cross-sectional study on 188 wheelchair users who  
93 received basic wheelchairs without formal service revealed that 93.1% of the wheelchairs will

94 still in use after an average of 18 months and that receiving the wheelchair was associated with a  
95 significant increase in independence and significantly decreased pressure ulcer incidence [16].  
96 These strong positive results bolstered the argument that the costlier approach promoted by the  
97 WHO may not be necessary. Meanwhile, because the study was cross-sectional and investigated  
98 a group who received a single type of wheelchair, it does not provide conclusive evidence of the  
99 relative value of providing wheelchairs through WHO's 8-step approach, nor provide reliable  
100 insight into whether it was the wheelchair or other factors which led the improvements. The first  
101 study we are aware of that investigated the impact of the WHO's 8-Step service approach was in  
102 Indonesia, and compared a group receiving wheelchairs through the 8-Step process to a waitlist  
103 control group at baseline and a 6-month follow-up [17]. Subjects who received new wheelchairs  
104 reported significant increases in physical health, environmental health, and satisfaction with their  
105 mobility devices as compared to the waitlist control group. Using a robust study design and  
106 validated outcome measures, this research helps to support WHO's 8-Step service provision  
107 approach but did not directly compare it to the standard of care. A longitudinal study of 200  
108 individuals who received one of two designs of wheelchairs [18] was conducted in Peru, Uganda,  
109 and Vietnam found that overall health indicators, distance traveled, and employment increased,  
110 and that wheelchair design had little impact on these results. This study was conducted on a  
111 population of users similar to an earlier study [16] and similarly did not receive services based on  
112 the 8-Step approach, did not include a control group, or use strongly validated outcome  
113 measures.

114 The only study we are aware of that compared across service provision models was a  
115 cross-sectional study that recorded data from 852 wheelchair users in Kenya and the Philippines  
116 [19,20]. The investigators used a proxy measure for services based on the subject's self-report of

117 how many service steps (from 0 to 8) occurred when they received their wheelchairs. The results  
118 suggest that users in Kenya versus the Philippines were more likely to use their wheelchairs daily  
119 (60% vs. 42%) and had higher activities of daily living (ADL) performance (80% vs. 74%)  
120 highlighting the country-level differences. The impact of increased services was largely  
121 dependent on what service was received. For instance, individuals who were assessed for a  
122 wheelchair (Step 2) were more likely to have a higher ADL performance. Similarly, individuals  
123 who received training (Step 7) were more likely to use their wheelchairs daily. This cross-  
124 sectional study of a relatively large subject pool provides strong evidence of the positive impact  
125 of services on the outcomes of wheelchair service provision.

126         The prior research evidence paints a positive but incomplete picture of the impact of  
127 service provision in the wheelchair sector. As a whole, the studies suggest that wheelchairs have  
128 a positive impact on the quality of life and health of wheelchair users, which is consistent with  
129 the goals and outcomes in more resourced settings [21], and that the degree to which services are  
130 provided increases that impact. But there is still a significant gap in evidence related to the  
131 specific benefits of an 8-step service provision approach, versus the standard of care. This is due  
132 to limitations in the previous studies associated with the study design, such as the lack of control  
133 groups, cross-sectional methodology, or weakly validated measures. Meanwhile, the need for  
134 this information is becoming increasingly important to meet a global push towards using  
135 evidence to drive policy changes related to rehabilitation and assistive health technology  
136 purchasing decisions. These goals have been emphasized by global collaborations such as  
137 through Call to Action in WHO's REHAB2030 [23], WHO's GATE Research Priorities [23],  
138 and AT scale [25].

139           The gaps in previous research along with the global focus on evidence-based decision  
140 making motivated our team to carry out a study that contrasted the outcomes associated with  
141 different types of wheelchair service provision strategies. This study design was tailored to  
142 identify hypotheses of potential outcomes and inform changes to, a wheelchair supplier  
143 (Consolidating Logistics for Assistive Technology Supply & Provision), whose goal is to sell a  
144 range of appropriate wheelchair models to buyers who then provide them through a global  
145 service network. The study was guided by the following research questions:

- 146       1) What are the key challenges to performing a longitudinal controlled wheelchair study in  
147       Indonesia?
- 148       2) What are some of the hypotheses related to the wheelchair model and its potential effects  
149       on key outcome variables such as performance, usability, reliability, and quality of life in  
150       Indonesia?

## 151 **Methods**

152           A longitudinal, mixed-methods study was carried out to evaluate the impact of  
153 wheelchair service provision from three wheelchair providers (WPs) in Indonesia: Puspadi, the  
154 Bunga Bali Foundation (BBF), and the Social Department. Puspadi is staffed by service  
155 providers who were all trained to provide services using the 8-Step service provision model  
156 described in the WHO guidelines [7], whereas BBF and Social Department used the standard-of-  
157 care where they distributed hospital-style wheelchairs to those who requested them without any  
158 clinical services.

159           Three research teams were involved in the project and secured IRB approval. A team  
160 from the Comprehensive Initiative on Technology Evaluation ([CITE](#)) at the Massachusetts

161 Institute of Technology designed the initial study and supported in-country data collection but  
162 was not involved in the final selection of the Standard of Care group. A team from Center for  
163 Health Policy and Management ([CHPM](#)), Gadjah Mada University led the data collection efforts  
164 in Indonesia. A team from the Department of Rehabilitation Sciences and Technology ([RST](#))  
165 from the University of Pittsburgh led data analysis and drafting of this manuscript. The study  
166 was supported with a grant from Google.org (grant #322068) which was awarded to United  
167 Cerebral Palsy - Wheels for Humanity ([UCP-W](#)) who contracted the other organizations to carry  
168 out the research. IRB approval was secured at Gadjah Mada University, RST, and MIT.

169

170 Wheelchair users on the waitlist from Puspadi and BBF and the Social Department were  
171 recruited into the study. Users who were 16 years or older, could interact and communicate help  
172 caregiver help, were recruited to participate in the study. The target sample size was limited by  
173 the size of the waitlist, which was just over 200 people. The sample size was also limited by the  
174 number of wheelchairs that were available at Puspadi, BBF, the Social Department as well as the  
175 study costs for wheelchairs.

176

177 Wheelchair users receiving wheelchairs from Puspadi were provided with one of five  
178 different wheelchair models according to their needs: Standard (Std.), Motivation Active Folding  
179 (MAF), UCP Expression (UCP), Rough Rider (RR), and Motivation Rough Terrain (MRT).  
180 These wheelchairs are shown in [Figure 1](#). Puspadi wheelchair service providers had received  
181 training using WHO packages to provide wheelchairs according to the 8-Step approach.  
182 Wheelchair users receiving wheelchairs from BBF were given a basic hospital-style wheelchair  
183 (H), see [Figure 1](#). Individuals providing wheelchairs at BBF had not been formally trained.



184

185

186

## 187 **Data collection methods & tools**

188 Data was collected from the subjects through in-person interviews that were used to  
189 record responses to a set of standardized questionnaires. The close-ended responses were entered  
190 into tablets by researchers from the CHPM Gadjah Mada University team using KoboToolbox, a  
191 survey software. The interviews were recorded, and the responses to open-ended questions were  
192 transcribed and translated into English by the research team at Gadjah Mada University .

193

194 The interview protocol was comprised of questions from a variety of questionnaires  
195 including the International Society of Wheelchair Professionals Minimum Uniform Data Set  
196 (ISWP-MUD), Wheelchair Skills Test Questionnaire (WST-Q) [25], Poverty Probability Index  
197 (PPI) [26] for Indonesia, and Life Satisfaction Questionnaire (LiSAT-11) [27], Breakdown and  
198 Adverse Consequences Questionnaire (BAC-Q) [29], Quebec User Satisfaction with Assistive  
199 Technology (QUEST) and Functional Mobility Assessment (FMA). We adapted all of the  
200 questionnaires to the local context in several ways. First, they were all were translated into one of  
201 the two the local Indonesian languages, Balinese or Bahasa. Second, the tools were modified to  
202 fit the cultural context based on testing in the field and feedback from local partners, such as the  
203 UCP Roda Untuk Kemanusiaan, Puspadi, BBF, and CHPM Gadjah Mada University . The

204 questionnaires were tested with similar types of wheelchair users before the data collection  
205 period.

206

207 [Table 1](#) provides an overview of the types of data collected through each questionnaire.

208 These questionnaires were administered at baseline and endline, 3-6 months after the start of the  
209 study, to all the wheelchair users who participated in the study.

210

211 ***Table 1: Questionnaires Administered at Baseline and Endline***

212

| Tool     | Data Type                                                         |
|----------|-------------------------------------------------------------------|
| ISWP-MUD | Demographics, wheelchair usage (self-report)                      |
| PPI*     | Likelihood of being under the poverty line                        |
| WST-Q    | Wheelchair skills                                                 |
| BAC      | Wheelchair repairs                                                |
| LiSAT-11 | Life satisfaction                                                 |
| QUEST    | Perception of satisfaction with assistive technology and services |
| FMA      | Self-reported effectiveness of wheeled mobility devices           |

\* data not reported at endline due to missing and incomplete data

## 213 **Data analysis & statistical evaluation**

214 Baseline demographic characteristics were compared between the 8-Steps group and  
215 Standard of Care group using independent samples t-tests and chi-squared tests (for continuous  
216 and categorical variables, respectively) to ensure comparable groups. Self-reported wheelchair

217 usage, in terms of days per week, hours per day, distance traveled and the places where the  
218 device was used were reported for each group, and the change from baseline to endline was  
219 described. The McNemar tests were used to determine significant consistency in the reported  
220 settings where wheelchairs were used. Additionally, stacked columns were used to compare  
221 frequency count across types of wheelchairs for wheelchair usage using Microsoft Excel.

222         Significant changes in wheelchair skills (as per WST-Q total scores) were also evaluated  
223 for the 8-Steps and the Standard of Care groups independently. The WST-Q was recorded for  
224 participants who owned a manual wheelchair at the beginning of the study, and to the  
225 participants who had used the wheelchair provided by the end of the study. Missing responses  
226 were considered as not valid scores. As owning a wheelchair would be important to the amount  
227 of change that we would expect, an independent samples t-test was used to determine differences  
228 in WST-Q scores between people who owned and did not own a wheelchair at baseline. A paired  
229 samples t-test within each group was used to compare changes between baseline and endline for  
230 those participants who owned a manual wheelchair at baseline and used the wheelchair provided  
231 during the study. Graphical analysis was performed across wheelchairs as part of secondary  
232 analysis for WST-Q. Wheelchair maintenance and repairs were analyzed using frequency  
233 statistics. IBM SPSS Statistics for Windows Version 25.0 (IBM Corp.) was used to perform all  
234 statistical analyses (alpha = .05).

235         ISWP-MUD gathered information about the participant's satisfaction with the study  
236 wheelchair. This information was analyzed using the Wilcoxon-signed rank test to determine  
237 changes from baseline to endline. As a secondary/exploratory analysis, a Kruskal-Wallis test was  
238 used to determine differences in satisfaction for people receiving different wheelchair models.  
239 Life satisfaction was assessed at baseline and endline using the LiSat-11 questionnaire, which

240 was comprised of 11 items, concerning life as a whole, vocation, economy, leisure, contacts,  
241 sexual life, ADL, family life, partner, physical health, and psychological health. The question  
242 about sexual health was removed due to the sensitive nature of the question, leaving 10  
243 questions. Satisfaction was estimated across a six-level scale (from 1 = very dissatisfied to  
244 6 = very satisfied), higher scores indicating higher levels of life satisfaction. A total score can be  
245 calculated (range: 10–60) [32].

## 246 **Results**

247 A total of 150 participants were recruited for the study, 15% of whom had not owned  
248 wheelchairs previously. A total of eight participants were excluded from data analysis, six that  
249 did not participate in the follow-up, and two that were deceased before the conclusion of the  
250 study. Therefore, longitudinal data from 142 participants was analyzed; 118 from the 8-Steps  
251 groups and 24 from the Standard of Care group.

252 Descriptive statistics of age, gender, mobility aid use, disability, and education level are  
253 shown for each group in [Table 2](#). There were no significant differences between the groups for  
254 gender ( $p=.169$ ). However, individuals in the SOC group were significantly older ( $p=.001$ ) and  
255 were less likely than the 8-Steps group to report using a mobility aid at enrollment ( $p=.001$ ;  
256 [Table 2](#)). There were also differences in reported diagnoses between groups. More than half of  
257 the participants recruited from the 8-Steps group participants had polio (51.7%), but no  
258 participants from the SOC group reported having polio. Due to the important differences  
259 between these two groups, subsequent results are presented separately.

260 **Table 2: Demographics**

|                           | 8-Steps (n=118)  | SOC (n=24)       |
|---------------------------|------------------|------------------|
|                           | <i>mean ± SD</i> | <i>mean ± SD</i> |
| <i>Age</i>                | 40.4 ± 12.6      | 57.4 ± 15.2      |
| <i>PPI</i>                | 2.97% ± 4.62     | 5.97% ± 5.38     |
|                           | <i>n (%)</i>     | <i>n (%)</i>     |
| <i>Female</i>             | 36 (30.5)        | 4 (16.7)         |
| <i>Using Mobility Aid</i> | 115 (97.5)       | 16 (66.6)        |
| <i>Medical Condition</i>  |                  |                  |
| Polio                     | 61 (51.7)        | 0                |
| Spinal Cord Injury        | 22 (18.6)        | 4 (16.7)         |
| Other (unknown)           | 20 (16.9)        | 9 (37.5)         |
| Cerebral Palsy            | 5 (4.2)          | 0                |
| Muscular Dystrophy        | 3 (2.5)          | 1 (4.2)          |
| Osteogenesis Imperfecta   | 3 (2.5)          | 1 (4.2)          |
| Amputation                | 2 (1.7)          | 0                |
| Brain Injury              | 1 (0.8)          | 0                |
| Stroke                    | 1 (0.8)          | 9 (37.5)         |
| <i>Education Level</i>    |                  |                  |
| None                      | 24 (20.3)        | 4 (16.7)         |
| Primary                   | 42 (35.6)        | 14 (58.3)        |
| Secondary                 | 21(17.8)         | 4 (16.7)         |
| High School +             | 29 (24.6)        | 2 (8.3)          |

*No wheelchair at baseline* 15 (12.7) 16 (66.6)

261

262 The majority of the participants from 8-Steps group used their wheelchair every day and  
263 traveled <500 meters per day at baseline and endline ([Table 3](#)). There were no major changes in  
264 the self-reported wheelchair usage between baseline and endline ([Table 3](#)). For usage measured  
265 by ‘days per week,’ the increase in the number of individuals reporting using their wheelchair 1-  
266 3 days a week at endline was almost entirely attributed to the individuals who did not have a  
267 wheelchair at baseline. Wheelchair usage was similar for individuals in the SOC group ([Table 3](#));  
268 the majority of participants used the device every day and traveled <500m. However, the  
269 majority of individuals in this group reported using their wheelchair between 1-6 hrs./day. More  
270 information about change over time for wheelchair usage (in terms of days per week and  
271 distance traveled per day) can be found in the Appendix.

272 The participants from the 8-Steps group reported usage in all settings at both time points  
273 ([Table 3](#)). The most frequently reported setting was ‘home’, but individuals also commonly used  
274 their wheelchair in ‘other public places’ and ‘outdoors on rough surfaces.’ The 8-Steps group  
275 had significant differences in almost all settings ([Table 3](#)). For example, 23 individuals at  
276 baseline who reported using their wheelchair at ‘home,’ reported not using their wheelchair at  
277 ‘home’ at endline. Similar negative changes were seen in other settings like ‘school,’ ‘work,’  
278 ‘outdoors on rough surfaces,’ and ‘leisure activities.’ The only two settings reported by this  
279 group at endline were ‘home’ and ‘other public places’. The SOC group had very small cell  
280 sizes, and thus, the differences were not statistically significant. At endline, 5(4.2%) participants  
281 from the 8-Steps group and 3 (12.5%) individuals from the SOC group reported they were not  
282 using the study wheelchair.

283 **Table 3: wheelchair usage descriptive statistics**

284

|              |           | Baseline n (%) | Endline n (%) | Baseline n (%) | Endline n (%) |
|--------------|-----------|----------------|---------------|----------------|---------------|
|              |           | N = 188        | N = 188       | N = 24         | N = 24        |
| No WC        |           | 15 (12.7)      | 5 (4.2)       | 16 (66.7)      | 3 (12.5)      |
| Days/week    | < 1 day   | 3 (2.5)        | 3 (2.5)       | 1 (4.2)        | 0             |
|              | 1-3 days  | 9 (7.6)        | 22 (18.6)     | 0 (0)          | 6 (25)        |
|              | 4-6 days  | 3 (2.5)        | 6 (5.1)       | 1 (4.2)        | 3 (12.5)      |
|              | Everyday  | 88 (74.6)      | 81 (68.6)     | 6 (25)         | 12 (50)       |
|              | Missing   | 0              | 1 (0.8)       | 0              | 0             |
| Hrs./day     |           |                |               |                |               |
|              | < 1 hour  | 4 (3.4)        | 11 (9.3)      | 2 (8.3)        | 2 (8.3)       |
|              | 1-3 hours | 28 (23.7)      | 35 (29.7)     | 0              | 11 (45.8)     |
|              | 4-6 hours | 13 (11)        | 17 (14.4)     | 3 (12.5)       | 4 (16.7)      |
|              | 7-8 hours | 4 (3.4)        | 7 (5.9)       | 1 (4.2)        | 0             |
|              | 8+ hours  | 54 (45.8)      | 41 (34.7)     | 2 (8.3)        | 4 (16.7)      |
|              | Missing   | 0              | 2 (1.7)       | 0              | 0             |
| Distance/day |           |                |               |                |               |
|              | < 100 m   | 40 (33.9)      | 54 (45.8)     | 6 (25)         | 18 (75)       |
|              | 100-499 m | 36 (30.5)      | 31 (26.3)     | 1 (4.2)        | 3 (12.5)      |

|                |           |                        |          |                        |
|----------------|-----------|------------------------|----------|------------------------|
| 500-999 m      | 16 (13.6) | 9 (7.6)                | 1 (4.2)  | 0                      |
| 1-5 km         | 9 (7.6)   | 16 (13.6)              | 0        | 0                      |
| 5 + km         | 2 (1.7)   | 1 (0.8)                | 0        | 0                      |
| Missing        | 0         | 2 (1.7)                | 0        | 0                      |
| <hr/>          |           |                        |          |                        |
| Places         |           |                        |          |                        |
| School         | 10 (8.5)  | 4 (3.4) <sup>a</sup>   | 0        | 0 <sup>d</sup>         |
| Home           | 93 (78.8) | 85 (72) <sup>b</sup>   | 7 (29.2) | 21 (87.5) <sup>c</sup> |
| Sports         | 21 (17.8) | 12 (10.2) <sup>c</sup> | 2 (8.3)  | 0 <sup>c</sup>         |
| Public- Other  | 68 (57.6) | 68 (57.6) <sup>c</sup> | 3 (12.5) | 4 (16.7) <sup>c</sup>  |
| Work           | 34 (28.8) | 20 (16.9) <sup>a</sup> | 1 (4.2)  | 0 <sup>c</sup>         |
| Transportation | 14 (11.9) | 7 (5.9) <sup>c</sup>   | 1 (4.2)  | 0 <sup>c</sup>         |
| Outdoors       | 53 (44.9) | 31 (26.3) <sup>a</sup> | 3 (12.5) | 0 <sup>c</sup>         |
| Leisure        | 40 (33.9) | 27 (22.9) <sup>a</sup> | 3 (12.5) | 0 <sup>c</sup>         |

<sup>a</sup> p<.05

<sup>b</sup> p=.001

<sup>c</sup> p>.05

<sup>d</sup> p-value couldn't be computed

285

286 Overall, most of the individuals receiving any of the wheelchairs reported using it every  
 287 day, except for individuals who received the MRT (Figure S5). Participants who received an  
 288 MRT were more likely to report using it only 1-3 days per week although a number of them still  
 289 reported using it every day. Interestingly, usage in hours per day was bimodal; individuals were  
 290 most likely to report using their wheelchair 1-3 hours per day or 8+ hours per day (Figure S5).



291 Individuals who received RR or Std were more likely to report using it the most (8+ hours per  
292 day), while individuals who received H or UCP were slightly more likely to report lower usage  
293 (1-3 hours per day). Additionally, the majority of participants reported traveling less than 100 m  
294 per day (Figure S5). This was similar for all types of wheelchairs in the 8-Steps group.  
295 Individuals who received H wheelchairs reported traveling the shortest distance, with no one  
296 having this type of wheelchair with a distance traveled over 500m. Individuals with RR and  
297 MRTs seemed to travel the longest distances, although some individuals with Std, UCP, and  
298 MAF's did report traveling >1km.

299 It is important to note that individuals could choose multiple settings where they used  
300 their wheelchair. Although wheelchair use at 'home' was the most frequently reported setting for  
301 all wheelchair types (Figure 2), there were some interesting differences in the other settings by  
302 wheelchair type. The participants who used H only reported usage at 'home' and 'other public  
303 places.' In contrast, those participants who used RR tended to report more settings and choose  
304 those settings that were less frequently chosen by the sample such as 'sports,' 'work,' and  
305 'transportation.' UCP users also reported usage in all settings but not as high as RR users.

## 306 **Wheelchair skills**

307 In the group, 15 (12.7%) participants did not own a wheelchair at baseline and did not  
308 have baseline WST-Q scores. At endline, the 8-Steps group had 8 (6.9%) participants with non-  
309 valid scores. From the 5 (4.2%) individuals who did not use the wheelchair from the study, 2  
310 (1.7%) of them also reported not owning a wheelchair at baseline, therefore, the tool was not  
311 administered. Thus, the final sample used for analysis was 92. Overall, average total WST-Q  
312 scores decreased from baseline (M=64.7, SD=17.9) to endline (M=58.6, SD=17.2) with an

313 average decrease of 6.03 points (SD=10.4). This difference was statistically significant,  $t(91) =$   
314  $5.542$ ,  $p < .001$ ,  $d = .577$ . There were no significant differences in final wheelchair skills for  
315 individuals who owned a wheelchair at baseline compared to those who did not own one. An  
316 independent sample t-test was conducted to determine whether there was a difference in WST-Q  
317 scores at endline between those participants who owned a wheelchair at baseline ( $n=103$ ) and  
318 those did not own one ( $n=15$ ). At endline, participants without a wheelchair at baseline  
319 ( $M=59.926$ ,  $SD=16.539$ ) had almost identical average skills when compared to those who owned  
320 a wheelchair at baseline ( $M=58.619$ ,  $SD=17.218$ ),  $t(103) = .257$ ,  $p = .797$ ,  $d = .076$ .

321 In the Standard of Care group, the majority of participants (16/24; 66.6%) did not own a  
322 wheelchair at baseline and 3 (12.5%) of them did not use the wheelchair provided. Also, one of  
323 the participants obtained a score of zero at baseline as all the individual skills were responded as  
324 “no” when asked about the capacity of doing them. Due to the extremely low sample size at each  
325 time-point, statistical tests for wheelchair skills were not performed in this group. In terms of  
326 wheelchair skills at baseline, For the 8 individuals with scores at baseline, the mean WST-Q  
327 score was 46.48 (SD=31.50). Regarding wheelchair skills for the 21 individuals with scores at  
328 endline, the mean WST-Q score was  $34.31 \pm 25.29$ .

329 Individuals in the 8-Steps group reported more basic skills and more intermediate skills  
330 than individuals in the SOC group ([Table 4](#)). In other words, more than 85% of participants from  
331 the 8-Steps group reported being able to roll short distances, turn, maneuver sideways, transfer  
332 on and to level surfaces, and roll on soft surfaces. On the other hand, less than 63% of the  
333 participants from the SOC group reported mastery of these skills, see [Table 4](#). However, a small  
334 number of participants from both groups reported capacity in advanced skills like ascending  
335 steep inclines and performing wheelies.

336 **Table 4: individual skills for WST-Q capacity at endline**

337

| Skill Level  | Individual Skill                 | 8-Steps      | SOC          |
|--------------|----------------------------------|--------------|--------------|
|              |                                  | <i>n</i> (%) | <i>n</i> (%) |
| Basic        | Rolls forward short distance     | 108 (91.5)   | 12 (50)      |
| Basic        | Rolls backward short distance    | 103 (87.3)   | 13 (54.2)    |
| Basic        | Turns in place                   | 103 (87.3)   | 15 (62.5)    |
| Basic        | Turns while moving forward       | 111 (94.1)   | 16 (66.7)    |
| Basic        | Turns while moving backward      | 106 (89.8)   | 13 (54.2)    |
| Basic        | Maneuvers sideways               | 105 (89)     | 10 (41.7)    |
| Basic        | Reaches high object              | 64 (54.2)    | 6 (25)       |
| Basic        | Pick object from floor           | 96 (81.4)    | 13 (54.2)    |
| Basic        | Operate body positioning options | 88 (74.6)    | 12 (50)      |
| Basic        | Relives weight from buttocks     | 99 (83.9)    | 13 (54.2)    |
| Basic        | Level transfer                   | 101 (85.6)   | 14 (54.2)    |
| Intermediate | Folds and unfolds wheelchair     | 71 (60.2)    | 7 (29.2)     |
| Intermediate | Gets through hinged door         | 90 (76.3)    | 8 (33.3)     |
| Intermediate | Rolls longer distance            | 87 (73.7)    | 12 (50)      |
| Intermediate | Avoids moving obstacles          | 91 (77.1)    | 8 (33.3)     |
| Intermediate | Ascends slight incline           | 89 (75.4)    | 5 (20.8)     |
| Intermediate | Descends slight incline          | 98 (81.3)    | 8 (33.3)     |
| Intermediate | Rolls across side-slope          | 64 (54.2)    | 7 (29.2)     |
| Intermediate | Rolls on soft surface            | 102 (86.4)   | 14 (58.3)    |

|              |                                            |           |           |
|--------------|--------------------------------------------|-----------|-----------|
| Intermediate | Gets over threshold                        | 89 (75.4) | 7 (29.2)  |
| Intermediate | Gets over gap                              | 43 (36.4) | 5 (20.8)  |
| Intermediate | Ascends low curb                           | 46 (39)   | 4 (16.7)  |
| Intermediate | Descends low curb                          | 53 (44.9) | 8 (33.3)  |
| Advanced     | Ascends steep incline                      | 18 (15.3) | 0         |
| Advanced     | Descends steep incline                     | 35 (29.7) | 0         |
| Advanced     | Ascends high curb                          | 11 (9.3)  | 1 (4.2)   |
| Advanced     | Descend high curb                          | 24 (20.3) | 2 (8.3)   |
| Advanced     | Performs stationary wheelie                | 29 (24.6) | 3 (12.5)  |
| Advanced     | Turns in place in wheelie position         | 19 (16.1) | 2 (8.3)   |
| Advanced     | Descends high curb in wheelie position     | 11 (9.3)  | 0         |
| Advanced     | Descends steep incline in wheelie position | 13 (11)   | 0         |
| Advanced     | Gets from the ground into wheelchair       | 79 (66.9) | 10 (41.7) |
| Advanced     | Ascends stairs                             | 8 (6.8)   | 2 (8.3)   |
| Advanced     | Descends stairs                            | 3 (2.5)   | 0         |

338

339 On a secondary analysis by wheelchair type, RR users reported higher wheelchair skills  
 340 scores (half  $\geq 70\%$ ) when compared to individuals with H wheelchairs (the majority having  
 341  $< 50\%$ ). Over time, highly skilled MAF and MRT users showed an increase in their WST-Q  
 342 scores at the end of the study while H users showed only a small increase compared to baseline  
 343 (Figure 2).

344

345 Figure 2. WST-Q scores per type of wheelchair

## 346 **Device satisfaction**

347 As part of the ISWP-MUD, the participants were asked to rate the satisfaction with their  
 348 wheelchair from 1 (not satisfied) to 5 (very satisfied). The 8-Steps group had a rate of M=4.06,  
 349 SD= 1.04 at baseline and M=4.15, SD=.99 at endline. The BBF group was slightly less satisfied  
 350 overall at baseline (M=3.88, SD=.83), but on average, it increased (M=4.28, SD=.64) at endline.  
 351 No significant differences were found for the participants' satisfaction rate about the device  
 352 between both time points. [Table 5](#) shows the satisfaction rate per type of wheelchair. No  
 353 significant differences were found when compared across wheelchairs.

354 ***Table 5: satisfaction rate based on the type of wheelchair***

355

|      | <b>Not satisfied</b> |          |          |           | <b>Very Satisfied</b> |                |
|------|----------------------|----------|----------|-----------|-----------------------|----------------|
|      | <b>1</b>             | <b>2</b> | <b>3</b> | <b>4</b>  | <b>5</b>              | <i>Missing</i> |
|      | 1 (3.8)              | 1 (3.8)  | 2 (7.7)  | 7 (26.9)  | 12 (46.2)             | 2 (7.7) *      |
| Std. | 0 (0)                | 2 (8.7)  | 2 (8.7)  | 9 (39.1)  | 8 (34.8)              | 0 (0) *        |
| MAF  | 0 (0)                | 2 (9.1)  | 2 (9.1)  | 9 (40.9)  | 9 (40.9)              | 0 (0)          |
| UCP  | 0 (0)                | 1 (3.8)  | 3 (11.5) | 7 (26.9)  | 14 (53.8)             | 1 (3.8)        |
| RR   | 0 (0)                | 0 (0)    | 5 (23.8) | 6 (28.6)  | 7 (33.3)              | 1 (4.8)*       |
| MRT  | 0 (0)                | 0 (0)    | 2 (8.3)  | 11 (45.8) | 8 (33.3)              | 0 (0)*         |
| H    | 1 (3.8)              | 1 (3.8)  | 2 (7.7)  | 7 (26.9)  | 12 (46.2)             | 2 (7.7) *      |

356 \*The totals do not add to 100% as some participants did not use the wheelchair from the study  
 357 (Std=1, MAF=2, MRT=2, H=3).

358

## 359 **Wheelchair maintenance and repair**

360 The 8-Steps group reported 34 (28.8%) subjects had wheelchairs that stopped functioning  
 361 correctly or broke. The most common complaint was one or more parking brakes no longer  
 362 functioned properly 9 (7.6%), followed by a bearing stopped turning smoothly 8 (6.8%). Some  
 363 other wheelchair repairs included tire replacement, broken wheels, and tire inflation. Of those  
 364 repairs recorded, 12 (10.2%) were performed by the participant or a family member followed by  
 365 the service that provided the wheelchair 11 (9.3%). Two individuals (1.7%) in the SOC group  
 366 had wheelchairs that stopped functioning correctly or had a broken wheel. In both instances, the  
 367 participant or a family member performed the repair.

368 The majority (n=87; 72.7%) of participants reported performing wheelchair maintenance.  
 369 The most-reported maintenance activity was wiping or washing the wheelchair 54 (45.8%)  
 370 followed by adding oil 20 (16.9%) and adding air to the tires 11 (9.3%). 8-Steps group or family  
 371 members did most of the wheelchair repairs 79 (66.9%). A total of 9 subjects from the SOC  
 372 group reported performing maintenance activities, 4(16.7%) subjects reported wiping or washing  
 373 the wheelchair followed by 2(8.3%) added air to the tires. All participants that reported  
 374 wheelchair maintenance, mentioned it was performed by the participant or a family member.

375 ***Table 6: LiSAT-11 8-Steps and SOC groups self-reported satisfaction at baseline and endline***

|                 | 8-Steps (n=118) |                | SOC (n=24)      |                |
|-----------------|-----------------|----------------|-----------------|----------------|
|                 | <i>Baseline</i> | <i>Endline</i> | <i>Baseline</i> | <i>Endline</i> |
| Life as a whole | 4.1 (1.4)       | 4.2 (1.5)      | 3.9 (1.2)       | 4.3 (.97)      |
| Vocation        | 3.2 (2.2)       | 3.6 (2.1)      | 3.7 (1.4)       | 3.3 (1.3)      |

|                            |           |           |           |           |
|----------------------------|-----------|-----------|-----------|-----------|
| Economy                    | 3.3 (1.6) | 3.3 (1.7) | 3.6 (1.4) | 2.7 (1.3) |
| Leisure                    | 4.0 (1.5) | 3.9 (1.7) | 4.2 (1.2) | 4.8 (.43) |
| Contact                    | 4.9 (.95) | 4.7 (1.2) | 4.3 (1.4) | 4.7 (.77) |
| Activities of Daily Living | 4.8 (1.0) | 4.7 (1.2) | 4.3 (1.2) | 4.5 (.96) |
| Family Life *              | 4.5 (1.2) | 4.6 (1.2) | 4.7 (1.1) | 4.3 (1.1) |
| Partner Relationship **    | 5.1 (.80) | 4.8 (.83) | 5.1 (.07) | 4.7 (.91) |
| Physical Health            | 4.2 (1.3) | 4.0 (1.6) | 4.2 (1.3) | 3.9 (1.5) |
| Psychological Health       | 4.5 (1.2) | 4.3 (1.6) | 4.7 (1.0) | 4.0 (1.4) |

---

\* participants living with  $\geq 1$  family member 8-Steps (n=110) SOC (n=23)

\*\* participants who reported having a partner 8-Steps (n=55) SOC (n=16)

376 Both the 8-Steps group and SOC group reported increased satisfaction in life as a whole. The 8-  
 377 Steps group also reported increased satisfaction in vocation and family life, while the SOC group  
 378 reported increased satisfaction in leisure, contact, and activities of daily living.

379

## 380 Discussion

381 The present study describes the characteristics of wheelchair usage, skills, maintenance  
 382 and repairs, and life satisfaction for individuals who received wheelchair services in the 8-Steps  
 383 group and those who did not receive services but still received wheelchairs (SOC group). The  
 384 fact that the majority of participants owned a wheelchair when they were recruited in the study  
 385 could be the reason why the patterns of wheelchair usage were not considerably different at the  
 386 end line. In other words, most of them used the new wheelchair in a similar way they did with  
 387 their previous one. The adherence to the new wheelchair was high, as more than 95% from the 8-

388 Steps group and more than 87% of participants from the SOC group, were still using the study  
389 wheelchair at endline. Although not directly comparable, users who received their wheelchair  
390 through the 8-step process from Puspadi had more usage daily, hourly, reported more distance  
391 traveled per day and more places where the device was used than the BBF group. This could be  
392 due to several factors, such as the provision of a wheelchair that did not meet their needs, it did  
393 not fit properly to their body, lack of user and maintenance training, environmental barriers, or  
394 due to differences in the population. These findings are aligned with those of the study published  
395 by Toro et al. [17] in Indonesia that suggested the positive impact of the WHO 8-steps in  
396 wheelchair provision.

397         The total scores for wheelchair skills were overall low for participants from both groups,  
398 however, the lowest scores were obtained by the participants who received wheelchairs from  
399 BBF and had no previous wheelchair. The average scores obtained in this study at endline (8-  
400 Steps group ( $\geq 70\%$ ) SOC group ( $\leq 50\%$ ), were considerably lower compared to the scores to  
401 previous studies. For example, the study done by Hosseini et al. obtained an average score of  
402 84% in the wheelchair skills test [29]. The average total score in the study by Kirby et al. [31] on  
403 the questionnaire version was 84.8%. In the study done by Toro et al. [17] in Indonesia, the  
404 participants who received wheelchair services with the WHO 8-Steps had scores of 70.6% for  
405 adults and 77.7% for adults and proxy. One reason why our results are different from the studies  
406 by Hosseini et al [29] and Kirby et al. [30] might be because all of the participants from these  
407 studies had spinal cord injury, relied exclusively on a manual wheelchair for mobility, and  
408 therefore might have had more training and practice. Our study population included subjects with  
409 a diverse set of disabilities, with Polio being most common ([Table 2](#)). The study by Toro et al.  
410 [17] had similar conditions as our study in terms of the application of the WHO 8-Steps and also



411 happened in Indonesia. However, their findings determined no significant differences in  
412 wheelchair skills between baseline and endline.

413           In contrast, in this study, wheelchair skills *decreased significantly* for those who owned a  
414 wheelchair at the beginning of the study and received services following the WHO 8-steps. This  
415 could imply that they found their new wheelchair more difficult to maneuver, in part because  
416 they had not fully adjusted to it. These results suggest additional wheelchair skills training may  
417 be necessary when a wheelchair user receives a replacement or a new wheelchair. As Toro et al.  
418 [17] emphasized, the wheelchair skills included in the WHO WSTP only include seven basic  
419 skills, that consist of pushing, turning, moving up and down slopes, moving up and down steps  
420 with assistance, and doing a partial wheelie. Our results suggested that almost all of the  
421 participants who had service providers following the WHO guidelines were able to push and  
422 turn. However, more training may be needed relating to moving up and down slopes and holding  
423 a wheelie. These skills are necessary for different environments indoors and outdoors as not  
424 being able to perform them can affect their community participation, self-esteem, quality of life,  
425 work and school attendance, and more. Learning these skills allows people to become more  
426 independent as maneuvering their wheelchair and having control over it is important to perform  
427 different activities in multiple settings. Even though there is an overall positive impact in  
428 following the WHO guidelines for wheelchair provision [17], it is necessary to provide education  
429 more about mobility skills to service providers so that they can provide training about more  
430 mobility skills to wheelchair users. This should, in fact, be considered not only in the WHO  
431 WSTP packages but also in educational programs as mentioned by Fung et al. [31 ] Besides,  
432 educational and training programs should include information not only about mobility and skills,

433 but also about maintenance and repairs to improve wheelchair provision and services around the  
434 world.

435 Future studies that consider WHO 8-steps as guidelines for wheelchair service provision  
436 could consider including training in more mobility skills. To measure the impact of both  
437 parameters in low- and middle-income countries, other studies could also consider children,  
438 youth, adults, and elderly people who have an appropriate wheelchair and are trained in multiple  
439 wheelchair skills. Further, additional studies could analyze the environment and accessibility  
440 conditions to be able to measure the impact of both appropriate wheelchair provision and an  
441 accessible environment so that social participation, work, school attendance, could be measured  
442 more objectively in developing countries. Overall, it would be useful to see more rigorous  
443 studies carried out in less-resourced countries to continue to improve wheelchair provision.

## 444 **Limitations**

445 The biggest limitation of the study was that the subject groups were not randomly  
446 assigned to wheelchair groups. Individuals from the 8-Steps group and the SOC group were  
447 significantly different; therefore, explicit group comparisons were not attempted. During the  
448 project, it seemed that at times there were not enough resources to fully complete the 8-step  
449 process and it was challenging to determine how well a group of providers is adhering to the 8-  
450 step process. In addition, some of the wheelchair users received a wheelchair three to four  
451 months before the baseline due to low distribution resources. This created issues with recall and  
452 confusion about which wheelchair type the data collectors were referring to in the study  
453 questions.

454           There are a variety of outcomes and impacts that could result from users having access to  
455 proper wheelchairs, training, and services. Some outcomes and impacts of having and using a  
456 wheelchair do not appear within a three- to six-month period, making it hard to measure all of  
457 the outcomes in this study.

458           One of the biggest limitations of this study was the difficulty of collecting data from  
459 participants from both groups at baseline and endline interviews. Even though all questionnaires  
460 were translated into local languages and responses were translated into English, the reliability of  
461 the translated questionnaires is still unknown. A reason for the missing data could be that some  
462 questions were not clear to participants. The lack of responses made it difficult to calculate and  
463 evaluate scores from validated questionnaires. Data loss and missing data implies challenges  
464 with data collection and may have led to questionable or biased results. In future studies, it will  
465 be important to limit the length of questionnaires to avoid participant fatigue, confirm that  
466 participants fully understand all of the questions, and ensure that the questionnaires are tested for  
467 reliability.

## 468 **Conclusion**

469           Our results provide general support that wheelchair users who are provided wheelchairs  
470 by service providers trained in the WHO 8-Step process have positive outcomes. We also found  
471 that outcomes are impacted by the wheelchair model used, reinforcing the need for proper  
472 assessments and a range of available wheelchairs. Our results support the need for increased  
473 wheelchair skills training to ensure that users learn how to use their new wheelchairs, and also  
474 can safely navigate through their environment. Finally, our study highlights many of the

475 challenges of performing outcomes research in this population and environment that should be  
476 taken into consideration when designing robust research studies in less-resourced environments.

## 477 **Acknowledgements**

478 The authors would like to thank the personnel of UCP Wheels for Humanity, Center for Health  
479 Policy and Management (CHPM), Gadjah Mada University, the Puspadi Bali, the  
480 Comprehensive Initiative on Technology Evaluation (CITE) at the Massachusetts Institute of  
481 Technology, specifically Kendra Leith and Julia Heyman, Dan Frey, and Nancy Adams.

482

## 483 **References**

- 484 1. Joint Position Paper on the Provision of Mobility Devices in Less-resourced Settings: A  
485 Step Towards Implementation of the Convention on the Rights of Persons with Disabilities  
486 (CRPD) Related to Personal Mobility. World Health Organization; 2011.
- 487 2. Pearlman J, Cooper RA, Zipfel E, Cooper R, McCartney M. Towards the development of  
488 an effective technology transfer model of wheelchairs to developing countries. *Disabil Rehabil*  
489 *Assist Technol.* 2006;1: 103–110.
- 490 3. Pearlman J, Cooper R, Krizack M, Lindsley A, Wu Y, Reisinger K, et al. Technical and  
491 Clinical Needs for Successful Transfer and Uptake of Lower-Limb Prosthetics and Wheelchairs  
492 in Low Income Countries. *IEEE-EMBS Magazine* (In Press). 2007;
- 493 4. Mukherjee G, Samanta A. Wheelchair charity: a useless benevolence in community-  
494 based rehabilitation. *Disabil Rehabil.* 2005;27: 591–596.

- 495 5. Kim J, Mulholland S. Seating/Wheelchair Technology in The Developing World: Need  
496 for A Closer Look. *Technol Disabil.* 1999;11: 21–27.
- 497 6. Sheldon S, Jacobs NA. Report of a Consensus Conference on Wheelchairs for  
498 Developing Countries: Bengaluru, India 6-11 November 2006. ISPO; 2007.
- 499 7. World Health Organization, WHO. Guidelines on the Provision of Manual Wheelchairs  
500 in Less Resourced Settings. World Health Organization; 2008.
- 501 8. WHO | Wheelchair Service Training Package - Basic level. World Health Organization;  
502 2017; Available: <http://www.who.int/disabilities/technology/wheelchairpackage/en/>
- 503 9. WHO | Launching of WHO Wheelchair Service Training Package for Managers and  
504 Stakeholders. World Health Organization; 2016; Available:  
505 <http://www.who.int/disabilities/technology/wheelchairpackage/wstpmanagers/en/>
- 506 10. Organization WH, Others. Wheelchair service training of trainers package. World Health  
507 Organization; 2017; Available:  
508 <http://apps.who.int/iris/bitstream/10665/258701/4/9789241512398-managers-eng.pdf>
- 509 11. Burrola-Mendez Y, Goldberg M, Gartz R, Pearlman J. Development of a Hybrid Course  
510 on Wheelchair Service Provision for clinicians in international contexts. *PLoS One.*  
511 [journals.plos.org](https://journals.plos.org); 2018;13: e0199251.
- 512 12. Burrola-Méndez Y, Goldberg M. Development and Implementation of a Hybrid  
513 Wheelchair Workshop for Clinicians in International Settings. [wheelchairnetwork.org](http://wheelchairnetwork.org).

- 514 Available: [http://wheelchairnetwork.org/wp-](http://wheelchairnetwork.org/wp-content/uploads/2018/01/ISS2018_HybridWorkshopPaper_20180220_YB.docx)  
515 [content/uploads/2018/01/ISS2018\\_HybridWorkshopPaper\\_20180220\\_YB.docx](http://wheelchairnetwork.org/wp-content/uploads/2018/01/ISS2018_HybridWorkshopPaper_20180220_YB.docx)
- 516 13. Gartz R, Goldberg M, Miles A, Cooper R, Pearlman J, Schmeler M, et al. Development  
517 of a contextually appropriate, reliable and valid basic Wheelchair Service Provision Test. *Disabil*  
518 *Rehabil Assist Technol.* 2017;12: 333–340.
- 519 14. Saha R, Dey A, Hatoj M, Poddar S. Study of Wheelcahir Operations in Rural Areas  
520 Covered Under the District Rehabilitaton Centre (DRC) Scheme. *Indian Journal of Disability*  
521 *and Rehabilitation.* 1990; 74–87.
- 522 15. Sheldon S, Jacobs NA. ISPO consensus conference on wheelchairs for developing  
523 countries: Conclusions and recommendations. *Prosthet Orthot Int.* Taylor & Francis; 2007;31:  
524 217–223.
- 525 16. Shore SL. Use of an economical wheelchair in India and Peru: impact on health and  
526 function. *Med Sci Monit.* 2008;14.
- 527 17. Toro ML, Eke C, Pearlman J. The impact of the World Health Organization 8-steps in  
528 wheelchair service provision in wheelchair users in a less resourced setting: a cohort study in  
529 Indonesia. *BMC Health Serv Res.* 2016;16: 26.
- 530 18. Shore S. The long-term impact of wheelchair delivery on the lives of people with  
531 disabilities in three countries of the world. *Afr J Disabil.* 2017;6: 344.

- 532 19. Bazant ES, Himelfarb Hurwitz EJ, Onguti BN, Williams EK, Noon JH, Xavier CA, et al.  
533 Wheelchair services and use outcomes: A cross-sectional survey in Kenya and the Philippines.  
534 Afr J Disabil. 2017;6: 318.
- 535 20. Williams E, Hurwitz E, Obaga I, Onguti B, Rivera A, Sy TRL, et al. Perspectives of basic  
536 wheelchair users on improving their access to wheelchair services in Kenya and Philippines: a  
537 qualitative study. BMC Int Health Hum Rights. 2017;17: 22.
- 538 21. Chaves ES, Boninger ML, Cooper R, Fitzgerald SG, Gray DB, Cooper RA. Assessing the  
539 influence of wheelchair technology on perception of participation in spinal cord injury1. Arch  
540 Phys Med Rehabil. Elsevier; 2004;85: 1854–1858.
- 541 22. Rehab 2030 Meeting Report [Internet]. World Health Organization; Available:  
542 <https://www.who.int/disabilities/care/Rehab2030MeetingReport2.pdf?ua=1>
- 543 23. Global priority research agenda for improving access to high-quality affordable assistive  
544 technology [Internet]. World Health Organization; Available:  
545 <http://apps.who.int/medicinedocs/documents/s23346en/s23346en.pdf>
- 546 24. ATscale Global Strategy [Internet]. AT Scale; Available:  
547 <https://static1.squarespace.com/static/5b3f6ff1710699a7ebb64495/t/5b55d6fb1ae6cf630bb0be94>  
548 [/1532352251993/Final+ATscale\\_2pager.pdf](https://static1.squarespace.com/static/5b3f6ff1710699a7ebb64495/t/5b55d6fb1ae6cf630bb0be94/1532352251993/Final+ATscale_2pager.pdf)
- 549 25. Mountain AD, Kirby RL, Smith C. The wheelchair skills test, version 2.4: Validity of an  
550 algorithm-based questionnaire version. Arch Phys Med Rehabil. 2004;85: 416–423.

- 551 26. Desiere S, Vellema W, D’Haese M. A validity assessment of the Progress out of Poverty  
552 Index (PPI)<sup>TM</sup>. *Eval Program Plann.* Elsevier; 2015;49: 10–18.
- 553 27. Post MW, van Leeuwen CM, van Koppenhagen CF, de Groot S. Validity of the Life  
554 Satisfaction questions, the Life Satisfaction Questionnaire, and the Satisfaction with Life Scale in  
555 persons with spinal cord injury. *Arch Phys Med Rehabil.* 2012;93: 1832–1837.
- 556 28. Toro ML, Worobey L, Boninger ML, Cooper RA, Pearlman J. Type and Frequency of  
557 Reported Wheelchair Repairs and Related Adverse Consequences Among People with Spinal  
558 Cord Injury. *Arch Phys Med Rehabil.* 2016;97: 1753–1760.
- 559 29. Hosseini SM, Oyster ML, Kirby RL, Harrington AL, Boninger ML. Manual wheelchair  
560 skills capacity predicts quality of life and community integration in persons with spinal cord  
561 injury. *Arch Phys Med Rehabil.* 2012;93: 2237–2243.
- 562 30. Kirby RL, Worobey LA, Cowan R, Pedersen JP, Heinemann AW, Dyson-Hudson TA, et  
563 al. Wheelchair Skills Capacity and Performance of Manual Wheelchair Users with Spinal Cord  
564 Injury. *Arch Phys Med Rehabil.* 2016;97: 1761–1769.
- 565 31. Fung KH, Rushton PW, Gartz R, Goldberg M, Toro ML, Seymour N, et al. Wheelchair  
566 service provision education in academia. *Afr J Disabil.* 2017;6: 340.
- 567 32. Melin, R., Fugl-Meyer, K. S., & Fugl-Meyer, A. R. (2003). Life satisfaction in 18- to 64-  
568 year-old swedes: In relation to education, employment situation, health and physical activity.  
569 *Journal of Rehabilitation Medicine*, 35(2), 84-90. doi:10.1080/165019703104075597



570 33. Kirby, R.L., Smith, C., Parker, K., McAllister, M., Boyce, J., Rushton, P.W., . . . Brandt,  
571 A. (2016) The Wheelchair Skills Program Manual version 4.3 “low tech, high impact”. Retrieved  
572 from [www.wheelchairskillsprogram.ca](http://www.wheelchairskillsprogram.ca).

573

## 574 **Supporting information**

### 575 **S1. Fig**

576

### 577 **S2. Fig**

|               | No WC | < 100<br>m | 100 m -<br>499 m | 500 m -<br>999 m | 1-5 km | > 5 km | Missing | <b>Total</b> |
|---------------|-------|------------|------------------|------------------|--------|--------|---------|--------------|
| No WC         | 2     | 8          | 2                | 2                | 1      | 0      | 0       | 15           |
| < 100 m       | 1     | 25         | 8                | 2                | 2      | 0      | 2       | 40           |
| 100 m-499 m   | 2     | 16         | 11               | 4                | 3      | 0      | 0       | 36           |
| 500 m - 999 m | 0     | 4          | 4                | 0                | 7      | 1      | 0       | 16           |
| 1-5 km        | 0     | 1          | 4                | 1                | 3      | 0      | 0       | 9            |
| > 5 km        | 0     | 0          | 2                | 0                | 0      | 0      | 0       | 2            |
| <b>Total</b>  | 5     | 54         | 31               | 9                | 16     | 1      | 2       | 118          |

578

579 ***S3. Fig***

580

581 ***S4. Fig.***



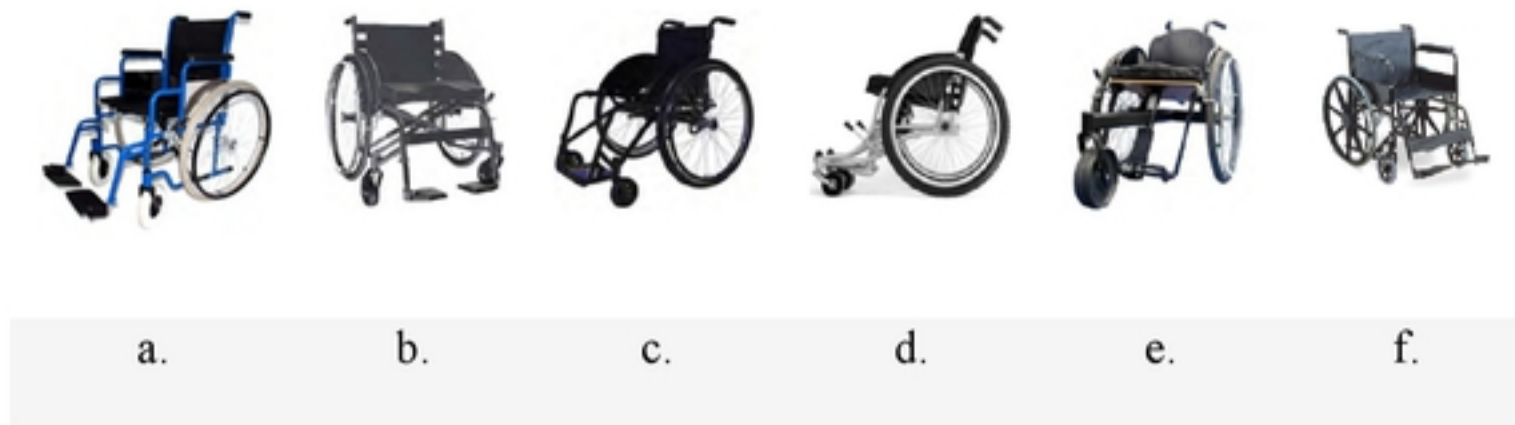

**Figure 1.** Types of wheelchairs provided. a. Std, b. MAF, c. UCP, d. RR, e. MRT, f. H

bioRxiv preprint doi: <https://doi.org/10.1101/2020.01.16.908772>; this version posted January 16, 2020. The copyright holder for this preprint (which was not certified by peer review) is the author/funder, who has granted bioRxiv a license to display the preprint in perpetuity. It is made available under aCC-BY 4.0 International license.

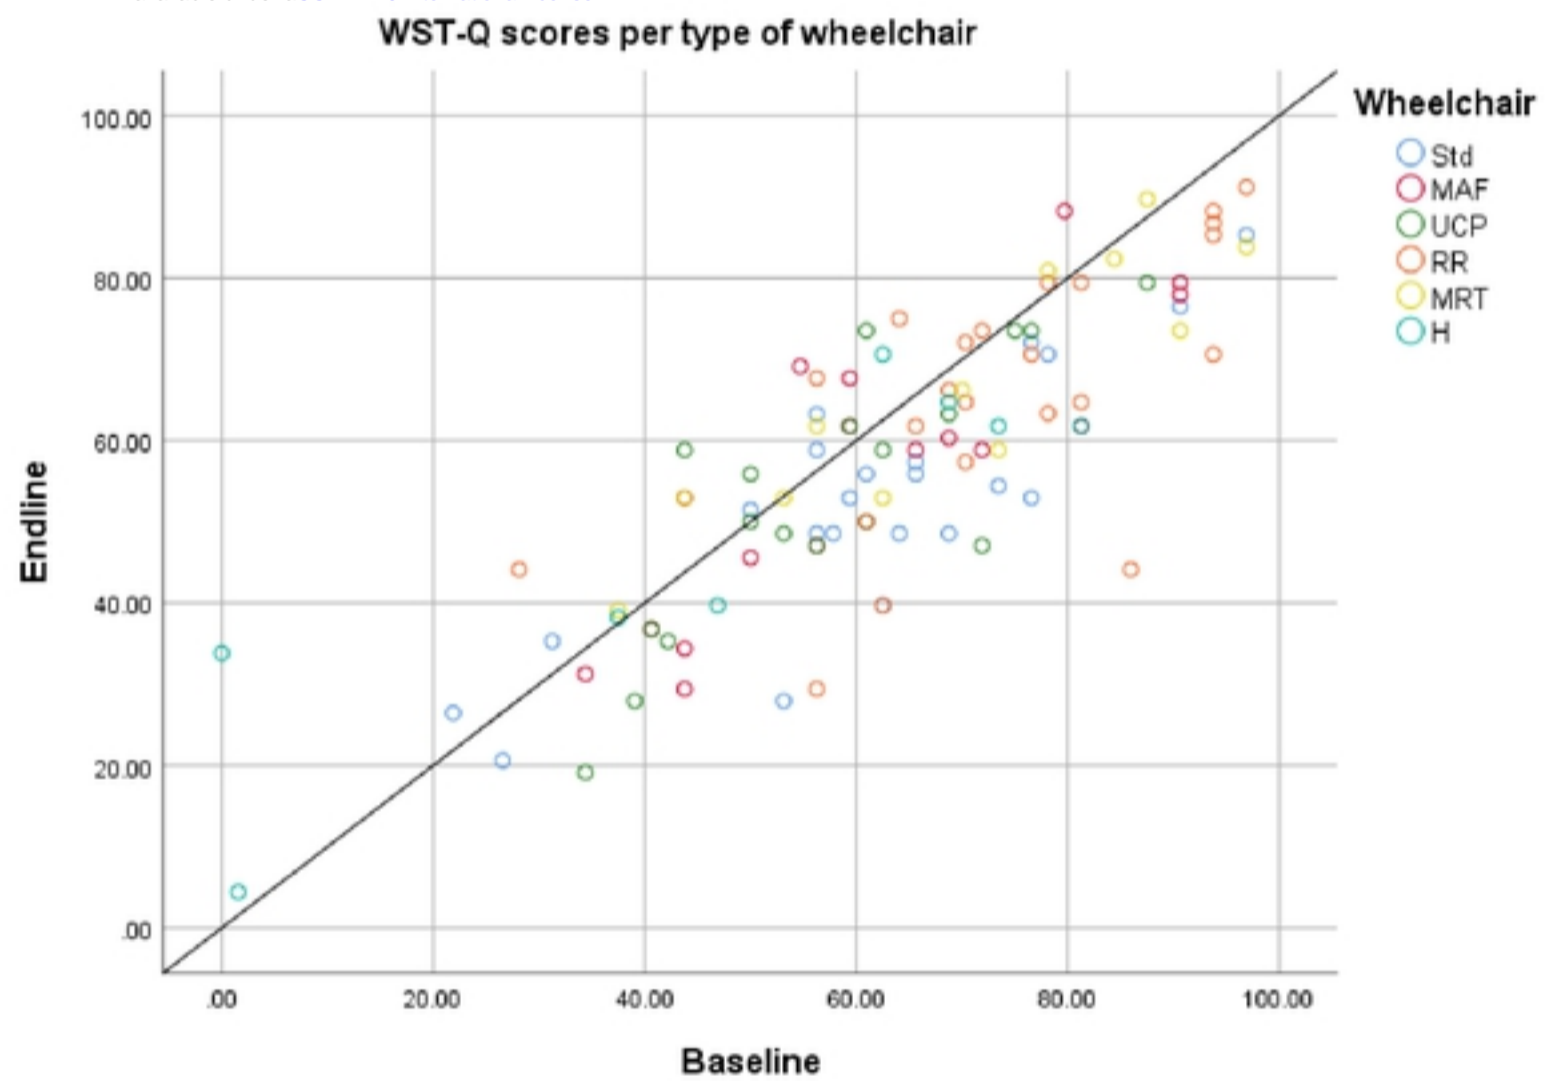

**Figure 2.** WST-Q scores per type of wheelchair
